# Supplementary material for: Layered double hydroxide ion exchangers on superparamagnetic microparticles for recovery of phosphate from waste water
Source: Royal Society of Chemistry journal article supplement (doi:10.1039/c2ta00571a), 2012-11-22
Supplement: c2ta00571a.pdf [file c2ta00571a.pdf]

## **SUPPLEMENTARY INFORMATION**

### **Layered double hydroxides ion exchangers on superparamagnetic microparticles for recovery of phosphate from waste water**

Karl Mandel<sup>a,b,\*</sup>, Asya Drenkova-Tuhtan<sup>c</sup>, Frank Hutter<sup>a</sup>, Carsten Gellermann<sup>a</sup>, Heidrun Steinmetz<sup>c</sup>, Gerhard Sextl<sup>a,b</sup>

a Fraunhofer Institute for Silicate Research, ISC, Neunerplatz 2, 97082 Würzburg, Germany

b University Würzburg, Chair of Chemical Technology of Materials Synthesis, Röntgenring 11, 97070 Würzburg, Germany

c University Stuttgart, Institute for Sanitary Engineering, Water Quality and Solid Waste Management,  
Bandtäle 2, 70569 Stuttgart, Germany

[\*] Corresponding-Author; email: karl.mandel@isc.fraunhofer.de

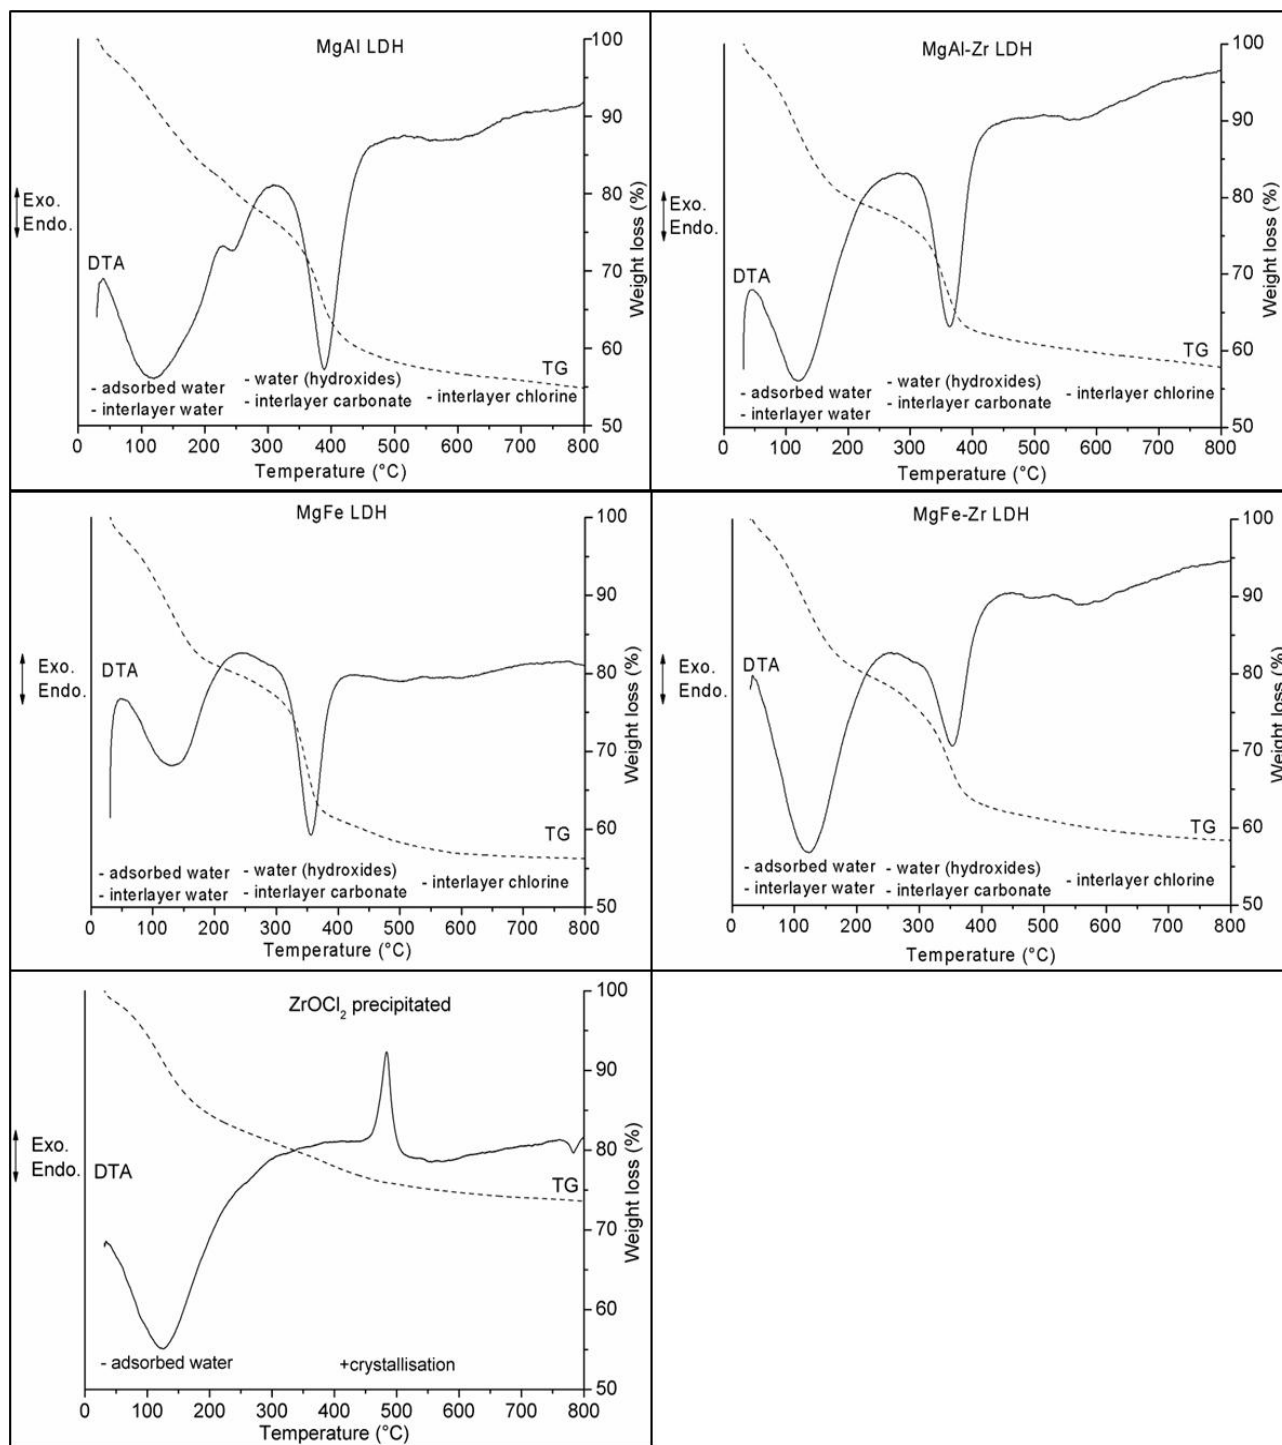

Figure S1: DTA-TG measurements for different LDHs prepared by fast coprecipitation

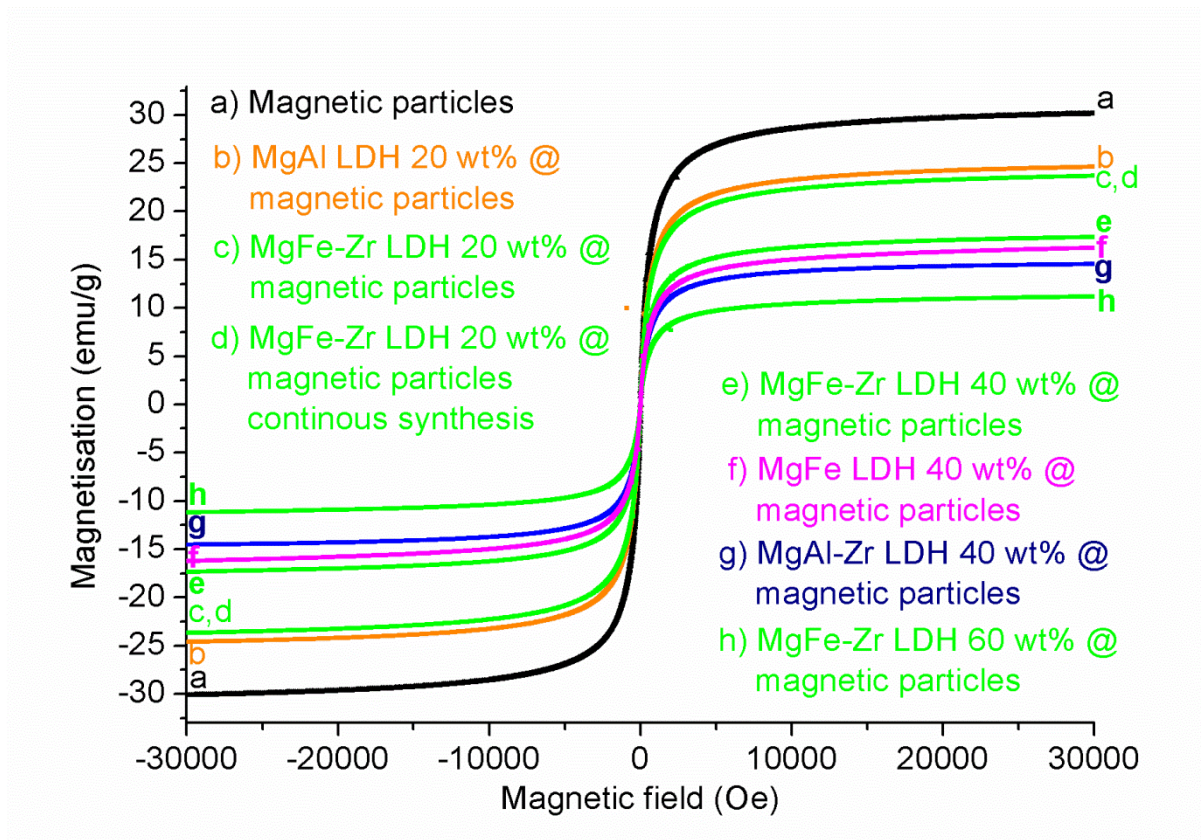

Figure S2: Vibrating sample magnetometer measurements (at 293 K) of superparamagnetic particles and composite particles (LDH deposited on superparamagnetic particles).

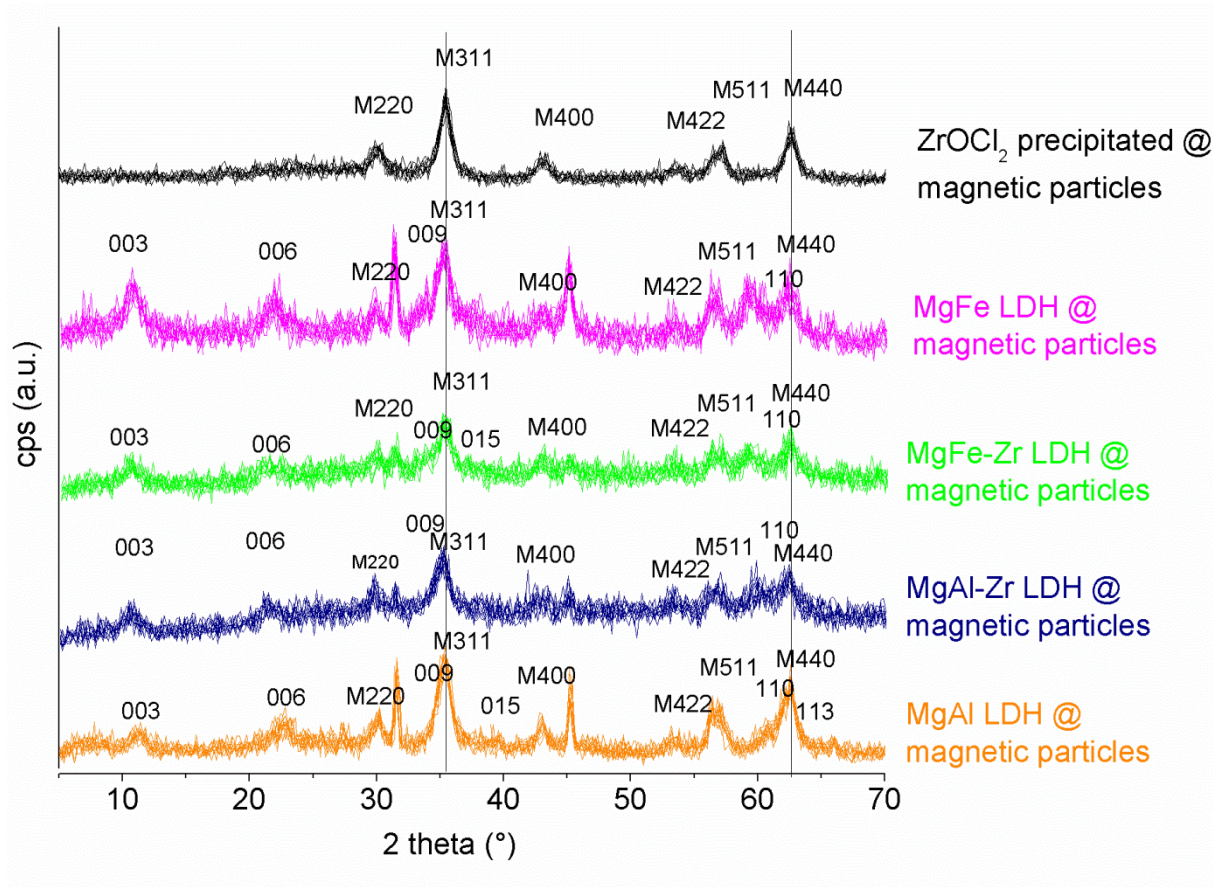

Figure S3: X-ray diffractograms of composite particles (LDH load 60 wt%). Reflexes of magnetite nanoparticles from the superparamagnetic microparticles are labelled with Mhkl. Reflexes of NaCl remain unlabelled.
